# Supplementary material for: Elemental screening of plant-based foods by slurry nebulization ICP-MS
Source: Royal Society of Chemistry journal article supplement (doi:10.1039/c9ja00340a), 2020-01-01
Supplement: c9ja00340a1.pdf [file c9ja00340a1.pdf]

## ***Supporting Information***

### **Elemental screening of the plant-based food by slurry nebulization ICP-MS**

Hao Cui, Wei Guo\*, Lanlan Jin, Yue'e Peng and Shenghong Hu

*State Key Laboratory of Biogeology and Environmental Geology, Faculty of Earth  
Sciences, China University of Geosciences, Wuhan 430074, P. R. China*

\*Corresponding Author.

Email address: Wei.Guo@cug.edu.cn (W. Guo).

Tel.: +86-027-67848602.

Table S1, 11 different types of surfactants were selected in this work

| Surfactants                      | Concentration | Medium       | Sample   | Stabilization time |
|----------------------------------|---------------|--------------|----------|--------------------|
| Tirtion-114                      | 0.01% $m/m$   | 0.5% $HNO_3$ | Rice,tea | <1h                |
| Tirtion-100                      | 0.01% $m/m$   | 0.5% $HNO_3$ | Rice,tea | <1h                |
| Tirtion-80                       | 0.01% $m/m$   | 0.5% $HNO_3$ | Rice,tea | <30min             |
| polyethylene glycol              | 1% $m/m$      | 0.02% $NaOH$ | Rice,tea | <1h                |
| sodium ligninsulfonate           | 0.1% $m/m$    | 0.02% $NaOH$ | Rice,tea | <1h                |
| N,N'-Methylenebisacrylamide      | 0.1% $m/m$    | water        | Rice,tea | <30min             |
| Polyacrylamide(3000 anions)      | 10-6 $m/m$    | water        | Rice,tea | <2h                |
| polyvinylpyrrolidone             | 0.05% $m/v$   | water        | Rice,tea | <30min             |
| sodium dodecyl benzene sulfonate | 0.05% $m/v$   | 0.5% $HNO_3$ | Rice,tea | <30min             |
| hexamethylene-tetramine          | 0.01% $m/v$   | water        | Rice,tea | <1h                |
| Polyethylene imine               | 0.5% $m/m$    | water        | Rice,tea | > 2h               |
| ammonia water                    | 5% $m/m$      | water        | Rice,tea | <2h                |
| without surfactants              | --            | water        | Rice,tea | <30min             |
